# Supplementary material
Source: PubMed Central journal article supplement (PMC4635058)
Supplement: NIHMS728530-supplement-Supplement_1.pdf [file NIHMS728530-supplement-Supplement_1.pdf]

# S1: Unusual waterfowl mortality investigation questionnaire, Netrokona

June 2011

|      |  |  |  |
|------|--|--|--|
| Date |  |  |  |
|------|--|--|--|

|    |  |  |  |
|----|--|--|--|
| ID |  |  |  |
|----|--|--|--|

## A. Owner's data:

1. Owner's name:

2. Address:

Para:

Village:

Union:

3. Socio-economic status: a. Rich b. Middle class c. Poor d. Ultra poor

## B. Farm Size:

a. Number of poultry in the farm:.....

b. Type of farming:

a. Backyard b. Small scale c. Large scale d. Industrial

c. Number of chickens: Age:

d. Number of ducks: Age:

e. Number of goose: Age:

e. Other birds

| Other Birds | Number | Age |
|-------------|--------|-----|
|             |        |     |
|             |        |     |
|             |        |     |

## C. Poultry morbidity and mortality data:

a. Mortality pattern

| Species | No. of total birds | # diseases | # dead | slaughter | Sick | Recovered |
|---------|--------------------|------------|--------|-----------|------|-----------|
|         |                    |            |        |           |      |           |

b. Date of onset of illness: ..... (dd/mm/yy)

c. Type of outcome: ☐ Recovered ☐ Dead ☐ still sick ☐ Slaughtered

d. Date of outcome: ..... (dd/mm/yy)

## D. Clinical presentation

| Clinical presentations | Put <input checked="" type="checkbox"/> on appropriate blanks |
|------------------------|---------------------------------------------------------------|
|------------------------|---------------------------------------------------------------|

|                                                              |  |
|--------------------------------------------------------------|--|
| Sudden death                                                 |  |
| Severe depression with ruffled feathers                      |  |
| Inappetence                                                  |  |
| Drastic decline in egg production                            |  |
| Edema of head and neck                                       |  |
| Swollen and cyanotic combs and wattles                       |  |
| Petechial hemorrhage on internal membrane surfaces           |  |
| Excessive thirst                                             |  |
| Watery diarrhoea                                             |  |
| Swollen and congested conjunctiva with occasional hemorrhage |  |
| Profuse hemorrhage between hocks and feet                    |  |
| Respiratory signs are dependent on tracheal involvement      |  |
| Nasal and ocular discharge                                   |  |
| Mucus accumulation (varies)                                  |  |
| Lack of energy                                               |  |
| Coughing/sneezing                                            |  |
| Incoordination                                               |  |
| Nervous system signs such as paralysis                       |  |
| Twisting of the head and neck                                |  |
| Swollen sinuses                                              |  |
| Neurologic signs in younger birds                            |  |
| Sinusitis                                                    |  |
| High temperature                                             |  |
| Shivering                                                    |  |
|                                                              |  |
|                                                              |  |

## **F. Feeding management**

a. How they are fed?

- ☐ Supplementary feed at home    ☐ Fully scavenging    ☐ Semi scavenging
- ☐ Open range scavenging at the swamps    ☐ Open range scavenging at the paddy fields
- ☐ Migrate to other areas

b. What type of feed they are supplemented (answer could be more than one):

- ☐ Rice    ☐ Broken rice    ☐ Rice polish    ☐ Fish meat    ☐ Left out foods    ☐ Ready made poultry feed
- ☐ Others (specify).....

## **H. Preventive measures**

What are the vaccines do you use for your ducks?

- ☐ Duck plague
- ☐ Duck cholera

### I. Specimen collection

| Types of specimen              | IDs |
|--------------------------------|-----|
| Cloacal swab                   |     |
| Tissue sample (frozen)         |     |
| Tissue sample (histopathology) |     |
| Impression smear (Slided)      |     |

J. Post mortem conducted? ☐ Yes ☐ NO

K. Interval Between death of the bird and conducting the post mortem examination in hours:

K. If yes, write down the post mortem lesions:

|                      |  |
|----------------------|--|
| Digestive system     |  |
| Respiratory system   |  |
| CNS                  |  |
| Integumenatry system |  |
| Others               |  |
