# Supplementary material
Source: PubMed Central journal article supplement (PMC4635058)
Supplement: NIHMS728530-supplement-Supplement_2.pdf [file NIHMS728530-supplement-Supplement_2.pdf]

## S2: Viral Transport Media (VTM)

### Basic Media

|   |                                                          |        |       |
|---|----------------------------------------------------------|--------|-------|
| 1 | DMEM (+high glucose, -pyruvate, 1X Gibco, Cat# 11965092) | (100%) | 500mL |
| 2 | HEPES 1M (Gibco)                                         | (2%)   | 10mL  |
| 3 | Pen-Strep 10000 IU/mL                                    | (1%)   | 5mL   |
| 4 | L-Glutamate 200mM                                        | (1%)   | 5mL   |

### Animal Viral Transport Media (Animal VTM)

|   |                                              |                      |        |
|---|----------------------------------------------|----------------------|--------|
| 1 | Basic Media                                  | (100%)               | 500mL  |
| 2 | BSA 7.5%v Gibco                              | (2.5%)               | 12.5mL |
| 3 | Fungizone (Amphotericin B) 250ug/mL          | (0.8%)               | 4mL    |
| 4 | Ofloxacin aliquot in 48mg/mL                 | 60mg/L               | 625uL  |
| 5 | Polymyxin B aliquot in $2 \times 10^6$ IU/mL | $2 \times 10^6$ IU/L | 500uL  |
| 6 | Sulfomethoxazole aliquot in 200mg/mL         | 0.2g/L               | 500uL  |
| 7 | Gentamycin 10mg/mL                           | 2.5%                 | 12.5mL |
| 8 | Na-pyruvate 100mM                            | 1mM                  | 5mL    |
